# Supplementary material for: Induction of apoptosis through downregulation of anti-apoptotic genes bcl-2 and Nucleolin in MCF-7 cells by Cleome gynandra leaf fractions containing Tricin, Pinocembrin, and Acacetin
Source: Research Square preprint supplement (doi:10.21203/rs.3.rs-5755739/v1), 2025-01-13
Supplement: Supplementary file 1 [file aa98099405cbfbff310be4e6.docx]

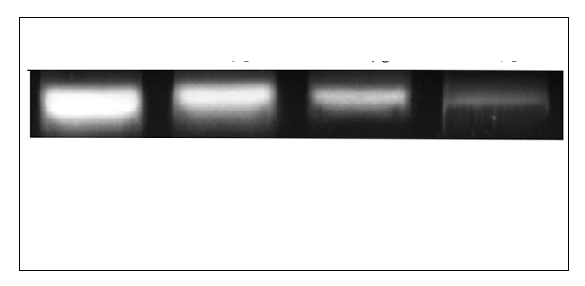


**Figure 6a represents the expression level of nucleolin as determined by RT-PCR in MCF-7 cells treated with different concentration of chloroform extract of F1 of CCG**


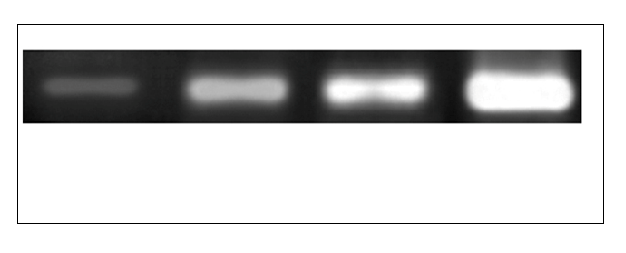


**Figure 6b represents the expression level of Bax as determined by RT-PCR in MCF-7 cells treated with different concentration of chloroform extract of F1 of CCG**


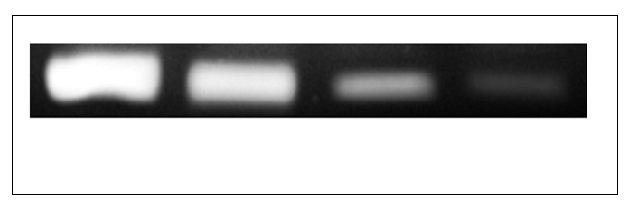


**Figure 6c represents the expression level of Bcl2 as determined by RT-PCR in MCF-7 cells treated with different concentration of chloroform extract of F1 of CCG**


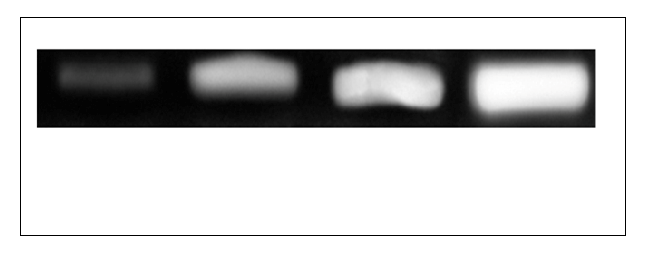


**Figure 6d represents the expression level of cytochrome as determined by RT-PCR in MCF-7 cells treated with different concentration of chloroform extract of F1 of CCG**


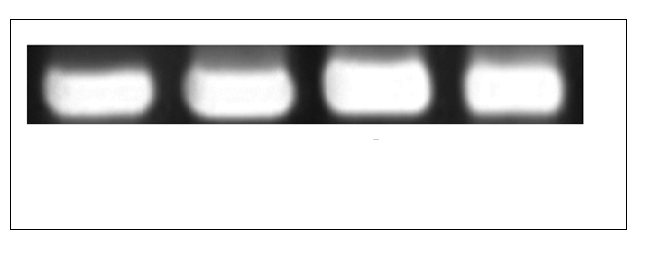


**Figure 6e represents the expression level of β-actin as determined by RT-PCR in MCF-7 cells treated with different concentration of chloroform extract of F1 of CCG**
